# Supplementary material for: A Chromosome Level Genome Assembly of a Winter Turnip Rape (Brassica rapa L.) to Explore the Genetic Basis of Cold Tolerance
Source: Front Plant Sci. 2022 Jul 15;13:936958. doi: 10.3389/fpls.2022.936958 (PMC9335200; doi:10.3389/fpls.2022.936958)
Supplement: Supplementary file 1 [file Data_Sheet_1.xls]

## Sheet: Sheet2
Supplementary Table S1. Comparison of 18 published B. rapa genomes with our assembly
Accession	Assembly (Mb)	BUSCOs (%)	Repeat length (Mb)	Repeat (%)	Annotated
Longyou-7	413.27	98.9	223	54.35	45844
BRO	378.31	97.3	183	48.36	46034
CCA	341.62	98	153	44.75	46875
CCB	378.47	98.1	187	49.49	44207
Chiifu	353.14	98	164	46.52	46878
CXA	378.75	97.8	183	48.27	45145
CXB	348.22	97.9	157	45.12	45911
MIZ	386.27	97.6	186	48.2	45350
OIA	434.64	97.4	221	50.93	45776
OIB	354.41	97.5	164	46.39	46553
OIC	337.46	94.7	154	45.73	45389
PCA	367.56	97.3	177	48.2	46550
PCB	389.26	97.5	187	48.12	46687
TCA	371.28	97.5	182	49.11	46420
TUA	368.7	97.5	174	47.12	47557
TUE	384.72	96.8	193	50.28	45845
TBA	422.86	97.5	217	51.32	45346
WTC	466.5	97.5	254	54.37	47602
Z1	401.93	97.7	179	44.42	46721

## Sheet: Sheet5
Supplementary Table S2. Transposable element and repeat sequence composition in LY7 genome
Repeat type	Classifiacation		Intact/Solo number	DNA content (bp)	DNA content (%)
Retrotransposon	LTR retrotrasposon	Copia	298537	59149229	14.3122
		Gypsy	33378	31204034	7.55038
		Others	7568	6057291	1.46567
DNA transposon	Subclass I	hAT	12784	4708354	1.13927
		CACTA	8032	4676070	1.13146
		Mutator	447564	47034907	11.381
		PIF/Harbinger	11160	4314472	1.04396
		Tc1/Mariner	2496	676466	0.163683
	Subclass II	Helitron	155055	68703211	16.624
Total			976574	226524034	54.8116

## Sheet: Sheet3
Supplementary Table S3. Information of genomes used for construction of graph-based pan-genome
Accession	Resource	Genome size/Mb	Pan-genome Size/Mb	Contribution to Pan-genome/Mb
REF	GCF_000309985.2	352.8	340
ASM	GCA_016163755.1	370.1	394	54
BRO	Cai, X.; Chang, L.; Zhang, T.; Chen, H.; Zhang, L.; Lin, R.; Liang, J.; Wu, J.; Freeling, M.; Wang, X. Impacts of allopolyploidization and structural variation on intraspecific diversification in Brassica rapa. Genome Biol 2021, 22, 166, doi:10.1186/s13059-021-02383-2.	378.31	448	54
BRT	GCA_018901965.1	316	492	44
CCA	Cai, X.; Chang, L.; Zhang, T.; Chen, H.; Zhang, L.; Lin, R.; Liang, J.; Wu, J.; Freeling, M.; Wang, X. Impacts of allopolyploidization and structural variation on intraspecific diversification in Brassica rapa. Genome Biol 2021, 22, 166, doi:10.1186/s13059-021-02383-2.	341.62	515	23
CCB	Cai, X.; Chang, L.; Zhang, T.; Chen, H.; Zhang, L.; Lin, R.; Liang, J.; Wu, J.; Freeling, M.; Wang, X. Impacts of allopolyploidization and structural variation on intraspecific diversification in Brassica rapa. Genome Biol 2021, 22, 166, doi:10.1186/s13059-021-02383-2.	378.47	533	18
CXA	Cai, X.; Chang, L.; Zhang, T.; Chen, H.; Zhang, L.; Lin, R.; Liang, J.; Wu, J.; Freeling, M.; Wang, X. Impacts of allopolyploidization and structural variation on intraspecific diversification in Brassica rapa. Genome Biol 2021, 22, 166, doi:10.1186/s13059-021-02383-2.	378.75	556	23
CXB	Cai, X.; Chang, L.; Zhang, T.; Chen, H.; Zhang, L.; Lin, R.; Liang, J.; Wu, J.; Freeling, M.; Wang, X. Impacts of allopolyploidization and structural variation on intraspecific diversification in Brassica rapa. Genome Biol 2021, 22, 166, doi:10.1186/s13059-021-02383-2.	348.22	567	9
MIZ	Cai, X.; Chang, L.; Zhang, T.; Chen, H.; Zhang, L.; Lin, R.; Liang, J.; Wu, J.; Freeling, M.; Wang, X. Impacts of allopolyploidization and structural variation on intraspecific diversification in Brassica rapa. Genome Biol 2021, 22, 166, doi:10.1186/s13059-021-02383-2.	386.27	591	24
OIA	Cai, X.; Chang, L.; Zhang, T.; Chen, H.; Zhang, L.; Lin, R.; Liang, J.; Wu, J.; Freeling, M.; Wang, X. Impacts of allopolyploidization and structural variation on intraspecific diversification in Brassica rapa. Genome Biol 2021, 22, 166, doi:10.1186/s13059-021-02383-2.	434.64	611	20
OIB	Cai, X.; Chang, L.; Zhang, T.; Chen, H.; Zhang, L.; Lin, R.; Liang, J.; Wu, J.; Freeling, M.; Wang, X. Impacts of allopolyploidization and structural variation on intraspecific diversification in Brassica rapa. Genome Biol 2021, 22, 166, doi:10.1186/s13059-021-02383-2.	354.41	635	24
OIC	Cai, X.; Chang, L.; Zhang, T.; Chen, H.; Zhang, L.; Lin, R.; Liang, J.; Wu, J.; Freeling, M.; Wang, X. Impacts of allopolyploidization and structural variation on intraspecific diversification in Brassica rapa. Genome Biol 2021, 22, 166, doi:10.1186/s13059-021-02383-2.	337.46	643	8
OUR	Longyou-7	413.27	666	23
PA	GCA_900412535.3	444	694	28
PCA	Cai, X.; Chang, L.; Zhang, T.; Chen, H.; Zhang, L.; Lin, R.; Liang, J.; Wu, J.; Freeling, M.; Wang, X. Impacts of allopolyploidization and structural variation on intraspecific diversification in Brassica rapa. Genome Biol 2021, 22, 166, doi:10.1186/s13059-021-02383-2.	367.56	706	12
PCB	Cai, X.; Chang, L.; Zhang, T.; Chen, H.; Zhang, L.; Lin, R.; Liang, J.; Wu, J.; Freeling, M.; Wang, X. Impacts of allopolyploidization and structural variation on intraspecific diversification in Brassica rapa. Genome Biol 2021, 22, 166, doi:10.1186/s13059-021-02383-2.	389.26	716	10
ROA	GCA_017639395.1	346.5	721	5
TBA	Cai, X.; Chang, L.; Zhang, T.; Chen, H.; Zhang, L.; Lin, R.; Liang, J.; Wu, J.; Freeling, M.; Wang, X. Impacts of allopolyploidization and structural variation on intraspecific diversification in Brassica rapa. Genome Biol 2021, 22, 166, doi:10.1186/s13059-021-02383-2.	422.86	741	20
TCA	Cai, X.; Chang, L.; Zhang, T.; Chen, H.; Zhang, L.; Lin, R.; Liang, J.; Wu, J.; Freeling, M.; Wang, X. Impacts of allopolyploidization and structural variation on intraspecific diversification in Brassica rapa. Genome Biol 2021, 22, 166, doi:10.1186/s13059-021-02383-2.	371.28	752	11
TUA	Cai, X.; Chang, L.; Zhang, T.; Chen, H.; Zhang, L.; Lin, R.; Liang, J.; Wu, J.; Freeling, M.; Wang, X. Impacts of allopolyploidization and structural variation on intraspecific diversification in Brassica rapa. Genome Biol 2021, 22, 166, doi:10.1186/s13059-021-02383-2.	368.7	762	10
TUE	Cai, X.; Chang, L.; Zhang, T.; Chen, H.; Zhang, L.; Lin, R.; Liang, J.; Wu, J.; Freeling, M.; Wang, X. Impacts of allopolyploidization and structural variation on intraspecific diversification in Brassica rapa. Genome Biol 2021, 22, 166, doi:10.1186/s13059-021-02383-2.	384.72	780	18
WTC	Cai, X.; Chang, L.; Zhang, T.; Chen, H.; Zhang, L.; Lin, R.; Liang, J.; Wu, J.; Freeling, M.; Wang, X. Impacts of allopolyploidization and structural variation on intraspecific diversification in Brassica rapa. Genome Biol 2021, 22, 166, doi:10.1186/s13059-021-02383-2.	466.5	789	9
Z1	Cai, X.; Chang, L.; Zhang, T.; Chen, H.; Zhang, L.; Lin, R.; Liang, J.; Wu, J.; Freeling, M.; Wang, X. Impacts of allopolyploidization and structural variation on intraspecific diversification in Brassica rapa. Genome Biol 2021, 22, 166, doi:10.1186/s13059-021-02383-2.	401.93	791	2

## Sheet: Sheet1
Supplementary Table S4. Information of currently reported cold-tolerance related genes and homologs of them in B. rapa
	Gene Symbol	Gene ID	Homolog in B.rapa	L7_24h_FPKM	L7_3h_FPKM	L7_CK_FPKM	L7_Re24h_FPKM	Le_24h_FPKM	Le_3h_FPKM	Le_CK_FPKM	Le_Re24h_FPKM	References
Arabidopsis Thaliana	AtGolS3	AT1G09350.1	Bra031663	110.8923 ± 38.8845	0.5438 ± 0.2806	0.3091 ± 0.2179	1.6291 ± 0.4727	117.2732 ± 52.2529	2.2472 ± 1.2805	0.9897 ± 0.7346	1.8846 ± 0.4794	Important roles of drought- and cold-inducible genes for galactinol synthase in stress tolerance in Arabidopsis thaliana
	PIF3	AT1G09530.6										Cold-Induced CBF-PIF3 Interaction Enhances Freezing Tolerance by Stabilizing the phyB Thermosensor in Arabidopsis
	COR47	AT1G20440.1										Characterization and differential expression of dhn/lea/rab-like genes during cold acclimation and drought stress in Arabidopsis thaliana
	lti45	AT1G20450.1	Bra025819	6709.2167 ± 212.1047	457.5063 ± 98.7576	227.1843 ± 87.6130	628.6577 ± 53.9428	10681.9233 ± 7355.0426	2293.1600 ± 295.3857	528.5980 ± 11.9953	672.7497 ± 181.7724	Characterization and differential expression of dhn/lea/rab-like genes during cold acclimation and drought stress in Arabidopsis thaliana
			Bra012230	1921.0233 ± 249.2530	228.5978 ± 152.2855	86.7348 ± 31.3153	535.0407 ± 46.8321	3107.8167 ± 418.4376	953.8133 ± 318.0831	154.4347 ± 21.2737	240.3990 ± 76.7758
	rab18	AT1G43890.3										The expression of a rab-related gene, rab18, is induced by abscisic acid during the cold acclimation process of Arabidopsis thaliana (L.) Heynh
	REIL2	AT2G24500.1	Bra032089	44.1964 ± 10.8199	14.2608 ± 4.5446	9.7996 ± 1.8931	10.2826 ± 1.4611	49.2283 ± 12.7521	30.8034 ± 8.2238	10.7646 ± 1.6101	17.2635 ± 4.0666	The REIL1 and REIL2 Proteins of Arabidopsis thaliana Are Required for Leaf Growth in the Cold
			Bra007844	0.0000 ± 0.0000	0.0312 ± 0.0270	0.0000 ± 0.0000	0.0000 ± 0.0000	0.0000 ± 0.0000	0.0155 ± 0.0268	0.0155 ± 0.0268	0.0152 ± 0.0262
	COR15B	AT2G42530.1	Bra000263	1019.0797 ± 80.2707	21.6764 ± 18.5921	9.3935 ± 5.5708	171.0261 ± 133.9010	1234.3463 ± 531.4330	67.2765 ± 20.5438	13.3087 ± 2.8957	95.5575 ± 35.9414	Hydrogen sulfide alleviates the cold stress through MPK4 in Arabidopsis thaliana
			Bra000265	1389.1300 ± 46.1907	210.7096 ± 174.4768	77.3255 ± 32.6737	704.3910 ± 199.9453	1710.3367 ± 813.1240	139.3307 ± 13.6140	17.7679 ± 3.4109	207.1118 ± 144.1568
	COR15A	AT2G42540.1										Cold Stress Activates the Expression of Genes of the Chloroplast Transcription Apparatus in Arabidopsis thaliana Plants
	PIF4	AT2G43010.3										Cold-Induced CBF-PIF3 Interaction Enhances Freezing Tolerance by Stabilizing the phyB Thermosensor in Arabidopsis
	ABI3	AT3G24650.1	Bra013248	0.0000 ± 0.0000	0.0000 ± 0.0000	0.0000 ± 0.0000	0.0000 ± 0.0000	0.0000 ± 0.0000	0.0000 ± 0.0000	0.0000 ± 0.0000	0.0000 ± 0.0000	Ectopic expression of ABI3 gene enhances freezing tolerance in response to abscisic acid and low temperature in Arabidopsis thaliana
	ICE1	AT3G26744.4										Hydrogen sulfide alleviates the cold stress through MPK4 in Arabidopsis thaliana
	lti30	AT3G50970.1										Characterization and differential expression of dhn/lea/rab-like genes during cold acclimation and drought stress in Arabidopsis thaliana
	PIF1	AT3G51700.1										Cold-Induced CBF-PIF3 Interaction Enhances Freezing Tolerance by Stabilizing the phyB Thermosensor in Arabidopsis
	PIF5	AT3G59060.1										Cold-Induced CBF-PIF3 Interaction Enhances Freezing Tolerance by Stabilizing the phyB Thermosensor in Arabidopsis
	IAA14	AT4G14550.1	Bra039855	0.2156 ± 0.1077	1.2280 ± 1.4820	0.2490 ± 0.1920	0.3869 ± 0.4298	1.4197 ± 1.7209	1.6237 ± 0.4995	5.0767 ± 2.1891	1.2534 ± 0.7736	Aux/IAA14 Regulates microRNA-Mediated Cold Stress Response in Arabidopsis Roots
	CBF2	AT4G25470.1	Bra010460	20.9764 ± 10.5398	31.4571 ± 37.5190	1.7263 ± 0.4961	2.9511 ± 1.1359	25.6229 ± 19.7544	94.7085 ± 21.8381	3.6895 ± 3.3794	0.7906 ± 0.1474	Arabidopsis CBF1 and CBF3 have a different function than CBF2 in cold acclimation and define different gene classes in the CBF regulon
			Bra010461	13.1320 ± 4.9522	39.2680 ± 24.2534	9.6029 ± 3.4759	11.4875 ± 2.8050	16.7615 ± 2.6181	136.2953 ± 34.0259	13.6860 ± 5.7828	3.6854 ± 3.2948
	CBF3	AT4G25480.1										Arabidopsis CBF1 and CBF3 have a different function than CBF2 in cold acclimation and define different gene classes in the CBF regulon
	CBF1	AT4G25490.1	Bra019162	219.4540 ± 75.1079	240.1283 ± 107.3366	26.7760 ± 5.1650	160.7680 ± 30.1098	376.9773 ± 133.3572	892.0923 ± 53.6612	63.9036 ± 13.2588	42.5868 ± 24.4494	Arabidopsis CBF1 and CBF3 have a different function than CBF2 in cold acclimation and define different gene classes in the CBF regulon
			Bra010463	69.9318 ± 30.4277	110.1236 ± 60.4306	9.9072 ± 3.3487	11.8764 ± 1.9984	114.7195 ± 52.0327	442.1047 ± 74.4659	14.0248 ± 8.1313	4.4773 ± 2.7966
	UGT79B2	AT4G27560.1										The Arabidopsis UDP-glycosyltransferases UGT79B2 and UGT79B3, contribute to cold, salt and drought stress tolerance via modulating anthocyanin accumulation
	UGT79B3	AT4G27570.1										The Arabidopsis UDP-glycosyltransferases UGT79B2 and UGT79B3, contribute to cold, salt and drought stress tolerance via modulating anthocyanin accumulation
	REIL1	AT4G31420.1	Bra011270	18.6656 ± 1.0013	21.4138 ± 1.5300	21.8466 ± 1.8061	24.5135 ± 2.0559	13.4922 ± 1.9646	11.0019 ± 1.3800	15.3082 ± 1.5198	14.5392 ± 2.3771	The REIL1 and REIL2 Proteins of Arabidopsis thaliana Are Required for Leaf Growth in the Cold
	OsSPX1	AT5G20150.1	Bra020088	0.0258 ± 0.0448	0.0822 ± 0.0808	0.0000 ± 0.0000	0.0000 ± 0.0000	0.0254 ± 0.0439	0.0000 ± 0.0000	0.0000 ± 0.0000	0.0000 ± 0.0000	OsSPX1 affects cold tolerance in plants Linna Zhao et al. Increased expression of OsSPX1 enhances cold/subfreezing tolerance in tobacco and Arabidopsis thaliana
			Bra006543	3.9064 ± 1.6478	2.2077 ± 0.3009	2.3073 ± 0.8608	2.5252 ± 0.6156	5.4519 ± 1.0046	2.8884 ± 2.6371	4.4413 ± 1.9743	1.3153 ± 0.2110
	RCAR5	AT5G45860.1	Bra025048	68.1347 ± 14.7138	2.3229 ± 0.8618	0.7487 ± 0.6756	1.4012 ± 0.7323	119.3308 ± 39.9703	15.3939 ± 3.7677	0.5947 ± 0.6128	1.5062 ± 0.8151	ABA-Dependent and ABA-Independent Functions of RCAR5/PYL11 in Response to Cold Stress
	ERF102	AT5G47230.1	Bra024953	3.0300 ± 1.0755	4.3147 ± 2.4251	2.7668 ± 0.8653	6.9077 ± 1.3368	3.5335 ± 0.3300	11.5273 ± 1.5251	19.9221 ± 5.5322	8.0845 ± 2.0011	Characterisation of the ERF102 to ERF105 genes of Arabidopsis thaliana and their role in the response to cold stress
			Bra017493	2.0734 ± 0.5585	2.9285 ± 1.6557	2.0662 ± 0.5913	6.8380 ± 1.4302	1.6497 ± 1.0224	5.8015 ± 1.0871	9.8164 ± 4.2804	6.7157 ± 1.9535
	ERF105	AT5G51190.1	Bra035732	16.1651 ± 1.6988	25.6498 ± 19.8824	17.4724 ± 9.6547	128.4027 ± 20.4567	19.2092 ± 2.8962	40.8994 ± 6.3172	83.4198 ± 19.5168	75.3246 ± 43.3748	Characterisation of the ERF102 to ERF105 genes of Arabidopsis thaliana and their role in the response to cold stress
	DREB1D	AT5G51990.1	Bra028290	8.5520 ± 6.4652	3.2265 ± 4.4449	1.4210 ± 0.5451	20.4214 ± 4.2163	17.9595 ± 5.1281	16.5181 ± 5.4217	20.2995 ± 11.8796	15.8948 ± 7.5905	Expression of a rice DREB1 gene, OsDREB1D, enhances cold and high-salt tolerance in transgenic Arabidopsis
	ERF104	AT5G61600.1	Bra029319	3.1086 ± 0.8573	6.3220 ± 0.4903	6.7942 ± 3.3143	27.1086 ± 9.7569	3.5000 ± 1.1335	7.3151 ± 0.8506	20.4127 ± 5.7101	10.9541 ± 7.3162	Characterisation of the ERF102 to ERF105 genes of Arabidopsis thaliana and their role in the response to cold stress
			Bra012938	5.5039 ± 0.4630	7.6981 ± 3.8534	7.2212 ± 2.5942	61.6788 ± 12.5471	11.6011 ± 5.2133	22.8079 ± 3.6522	48.1015 ± 15.7481	29.5347 ± 5.7525
	HOS2	AT5G63980.1	Bra024255	12.0343 ± 2.7861	10.9046 ± 1.5745	8.5587 ± 1.1589	7.1422 ± 0.7783	15.1503 ± 6.2567	28.1206 ± 13.5251	12.2540 ± 1.8276	14.3963 ± 7.4253	Cold-regulated gene expression and freezing tolerance in an Arabidopsis thaliana mutant
			Bra037760	8.9300 ± 2.6459	12.5209 ± 3.7653	8.1929 ± 0.8923	4.6051 ± 1.8747	8.0976 ± 3.1318	26.0289 ± 10.4852	11.2981 ± 2.0249	15.4678 ± 7.7085
Brassica rapa	BrAFP1	Bra004004.1	Bra004004	8.6094 ± 1.9171	1.8660 ± 0.6688	2.0749 ± 0.8576	3.4902 ± 0.5192	21.3024 ± 8.3553	1.0350 ± 0.4515	2.0957 ± 1.4224	4.5103 ± 0.7836	Overexpression of BrAFP1 gene from winter rapeseed (Brassica rapa) confers cold tolerance in Arabidopsis
	BrANS1	Bra019350.1	Bra019350	0.6174 ± 0.1191	0.234 ± 0.1524	0.1985 ± 0.0612	0.158 ± 0.1383	0.2942 ± 0.3729	0.2184 ± 0.1388	0.1132 ± 0.0516	0.1217 ± 0.131	Anthocyanin biosynthesis for cold and freezing stress tolerance and desirable color in Brassica rapa
	BrANS2	Bra017132.1	Bra017132	0.0885 ± 0.1099	0.1167 ± 0.1565	0.0000 ± 0.0000	0.0364 ± 0.0316	0.0554 ± 0.0563	0.3831 ± 0.1448	0.1379 ± 0.0732	0.263 ± 0.4555	Anthocyanin biosynthesis for cold and freezing stress tolerance and desirable color in Brassica rapa
	BrANS3	Bra013652.1	Bra013652	6.0008 ± 0.4086	1.9608 ± 0.7890	1.5572 ± 0.9526	1.3202 ± 0.8663	0.5091 ± 0.5603	0.3146 ± 0.2990	0.3234 ± 0.1344	1.2941 ± 1.2973	Anthocyanin biosynthesis for cold and freezing stress tolerance and desirable color in Brassica rapa
	BrANS4	Bra000045.1	Bra000045	0.0000 ± 0.0000	0.0000 ± 0.0000	0.0000 ± 0.0000	0.0174 ± 0.0301	0.0000 ± 0.0000	0.1115 ± 0.1931	0.0207 ± 0.0359	0.0704 ± 0.1219	Anthocyanin biosynthesis for cold and freezing stress tolerance and desirable color in Brassica rapa
	TIL	Bra002674.1	Bra002674	66.894 ± 4.3946	7.6449 ± 4.1907	2.1652 ± 0.903	28.6651 ± 6.0215	38.8197 ± 10.1896	23.0438 ± 8.0604	4.481 ± 2.868	10.3658 ± 4.9111	Transcriptome Analysis Reveals Key Cold-Stress-Responsive Genes in Winter Rapeseed (Brassica rapa L.)
	ZAT12	Bra020284.1	Bra020284	1.3091 ± 0.9599	0.6012 ± 0.7497	0.1085 ± 0.1879	5.2243 ± 2.3785	2.8906 ± 1.9811	12.8182 ± 0.3715	2.2686 ± 0.7938	4.0196 ± 3.114	Transcriptome Analysis Reveals Key Cold-Stress-Responsive Genes in Winter Rapeseed (Brassica rapa L.)
	ZAT12	Bra002528.1	Bra002528	92.729 ± 37.0747	28.5918 ± 22.0491	8.9916 ± 1.9847	106.9677 ± 6.1568	192.5083 ± 94.0551	160.859 ± 37.753	88.8155 ± 12.4686	78.3125 ± 29.6743	Transcriptome Analysis Reveals Key Cold-Stress-Responsive Genes in Winter Rapeseed (Brassica rapa L.)
	ERD10	Bra025819.1	Bra025819	6709.2167 ± 212.1047	457.5063 ± 98.7576	227.1843 ± 87.613	628.6577 ± 53.9428	10681.9233 ± 7355.0426	2293.16 ± 295.3857	528.598 ± 11.9953	672.7497 ± 181.7724	Transcriptome Analysis Reveals Key Cold-Stress-Responsive Genes in Winter Rapeseed (Brassica rapa L.)
	SAHH2	Bra028345.1	Bra028345	382.692 ± 13.6772	89.3044 ± 19.8015	12.5123 ± 2.6673	13.2657 ± 3.4091	390.676 ± 41.7933	224.685 ± 70.8134	55.696 ± 7.1627	30.348 ± 5.8657	Transcriptome Analysis Reveals Key Cold-Stress-Responsive Genes in Winter Rapeseed (Brassica rapa L.)
	ADS2	Bra021736.1	Bra021736	450.9613 ± 73.6498	95.9937 ± 11.2089	18.2939 ± 4.9288	48.9613 ± 7.2774	536.2793 ± 139.6243	187.5127 ± 11.7945	16.6941 ± 1.7726	34.5365 ± 10.892	Identification of differentially expressed genes involved in amino acid and lipid accumulation of winter turnip rape (Brassica rapa L.) in response to cold stress
	ADS2	Bra022837.1	Bra022837	106.2385 ± 13.0658	46.972 ± 8.4031	12.1081 ± 3.9456	21.6318 ± 1.9427	140.2547 ± 41.513	104.736 ± 6.8593	21.0583 ± 2.7662	22.2643 ± 5.7067	Identification of differentially expressed genes involved in amino acid and lipid accumulation of winter turnip rape (Brassica rapa L.) in response to cold stress
	CID9	Bra021559.1	Bra021559	0.0000 ± 0.0000	0.0000 ± 0.0000	0.0381 ± 0.066	0.0000 ± 0.0000	0.0184 ± 0.0318	0.0000 ± 0.0000	0.0000 ± 0.0000	0.0532 ± 0.0921	Identification of differentially expressed genes involved in amino acid and lipid accumulation of winter turnip rape (Brassica rapa L.) in response to cold stress
	DGK5	Bra036672.1	Bra036672	3.0121 ± 1.1111	3.9201 ± 0.7843	5.1906 ± 0.461	4.9141 ± 1.334	1.5058 ± 0.7458	3.3817 ± 0.7212	4.5405 ± 0.9637	4.6736 ± 1.9647	Identification of differentially expressed genes involved in amino acid and lipid accumulation of winter turnip rape (Brassica rapa L.) in response to cold stress
	KCS20	Bra035992.1	Bra035992	2.8639 ± 0.3816	6.1926 ± 0.7786	2.4956 ± 0.5274	2.7094 ± 0.5333	2.9727 ± 0.981	7.0691 ± 1.6782	21.4099 ± 8.4819	5.0972 ± 0.4918	Identification of differentially expressed genes involved in amino acid and lipid accumulation of winter turnip rape (Brassica rapa L.) in response to cold stress
	PSP	Bra016548.1	Bra016548	5.3452 ± 0.52	12.7385 ± 4.0677	14.3655 ± 3.1645	9.9338 ± 3.7885	10.5524 ± 4.2227	30.518 ± 5.4351	46.9942 ± 4.9861	22.612 ± 1.2048	Identification of differentially expressed genes involved in amino acid and lipid accumulation of winter turnip rape (Brassica rapa L.) in response to cold stress
	PGDH2	Bra016589.1	Bra016589	34.5263 ± 4.5947	54.5637 ± 8.1492	75.4431 ± 12.7411	53.6197 ± 14.6717	39.3838 ± 6.7596	83.8056 ± 25.1229	93.7173 ± 12.1331	84.4617 ± 13.3799	Identification of differentially expressed genes involved in amino acid and lipid accumulation of winter turnip rape (Brassica rapa L.) in response to cold stress
	AGT1	Bra013148.1	Bra013148	1.0615 ± 0.6175	0.8768 ± 0.0724	0.5017 ± 0.2176	4.706 ± 5.6977	11.5839 ± 2.8719	2.2381 ± 1.1996	5.1364 ± 2.0967	10.4468 ± 2.661	Identification of differentially expressed genes involved in amino acid and lipid accumulation of winter turnip rape (Brassica rapa L.) in response to cold stress
	P5CSA	Bra005012.1	Bra005012	512.9493 ± 15.7186	57.6841 ± 25.12	50.3721 ± 24.0421	174.61 ± 8.8318	452.9853 ± 113.5217	31.4941 ± 10.6263	23.4758 ± 3.672	130.3585 ± 91.8165	Identification of differentially expressed genes involved in amino acid and lipid accumulation of winter turnip rape (Brassica rapa L.) in response to cold stress
	P5CSA	Bra017051.1	Bra017051	5.7848 ± 4.5672	1.0328 ± 1.0464	1.8823 ± 2.8214	1.7443 ± 1.2057	4.62 ± 0.5196	0.2822 ± 0.1474	0.4858 ± 0.4173	2.8623 ± 2.772	Identification of differentially expressed genes involved in amino acid and lipid accumulation of winter turnip rape (Brassica rapa L.) in response to cold stress
	P5CSB	Bra007179.1	Bra007179	643.22 ± 241.1699	25.9284 ± 1.6701	20.8703 ± 5.5212	52.5323 ± 16.9165	366.3483 ± 67.4248	46.1104 ± 13.0764	14.9297 ± 1.6141	38.2554 ± 10.4284	Identification of differentially expressed genes involved in amino acid and lipid accumulation of winter turnip rape (Brassica rapa L.) in response to cold stress
	MS2	Bra001090.1	Bra001090	5.4015 ± 1.5878	5.1558 ± 0.9773	5.1875 ± 0.614	4.2968 ± 0.3244	10.183 ± 0.9003	13.5451 ± 2.3983	12.5437 ± 4.5004	8.7897 ± 2.4614	Identification of differentially expressed genes involved in amino acid and lipid accumulation of winter turnip rape (Brassica rapa L.) in response to cold stress
	CYSD1	Bra001131.1	Bra001131	2.0669 ± 1.0328	1.7183 ± 0.1935	9.0987 ± 6.1761	8.1115 ± 10.8832	3.635 ± 1.807	4.2891 ± 0.5226	16.6341 ± 0.9462	13.5136 ± 11.4122	Identification of differentially expressed genes involved in amino acid and lipid accumulation of winter turnip rape (Brassica rapa L.) in response to cold stress
	EMB3004	Bra001195.1	Bra001195	2.5166 ± 0.3431	2.1708 ± 1.339	2.5404 ± 0.7512	1.9366 ± 0.5629	1.9098 ± 0.8712	3.1017 ± 0.4545	3.551 ± 0.4435	3.1796 ± 0.5222	Identification of differentially expressed genes involved in amino acid and lipid accumulation of winter turnip rape (Brassica rapa L.) in response to cold stress
	OMR1	Bra001289 .1	Bra001289	13.7347 ± 3.6217	10.6994 ± 3.4433	8.1287 ± 3.8338	5.6186 ± 2.5364	7.7703 ± 3.3651	4.7969 ± 2.4192	6.2166 ± 0.5723	5.2731 ± 2.3381	Identification of differentially expressed genes involved in amino acid and lipid accumulation of winter turnip rape (Brassica rapa L.) in response to cold stress
	TKPR1	Bra038342.1	Bra038342	0.1596 ± 0.1382	0.0000 ± 0.0000	3.989 ± 6.6504	18.1983 ± 31.1586	0.0196 ± 0.0339	0.0000 ± 0.0000	0.0414 ± 0.0359	0.0192 ± 0.0333	Characterization of dihydroflavonol 4-reductase (DFR) genes and their association with cold and freezing stress in Brassica rapa
	TKPR1	Bra031666.1	Bra031666	1.9501 ± 0.3245	1.0918 ± 0.7582	1.8419 ± 0.866	2.6679 ± 0.5366	1.1643 ± 0.1191	0.9418 ± 0.5303	2.6641 ± 0.3968	1.8756 ± 0.953	Characterization of dihydroflavonol 5-reductase (DFR) genes and their association with cold and freezing stress in Brassica rapa
	CCR1	Bra026600.1	Bra026600	4.1296 ± 0.2278	14.3646 ± 1.4191	15.8998 ± 6.9997	9.6793 ± 2.249	2.7766 ± 0.9186	5.7245 ± 0.6698	10.9348 ± 1.6544	11.1313 ± 1.951	Characterization of dihydroflavonol 6-reductase (DFR) genes and their association with cold and freezing stress in Brassica rapa
	TKPR2	Bra024747.1	Bra024747	0.0000 ± 0.0000	0.0000 ± 0.0000	0.0000 ± 0.0000	0.0000 ± 0.0000	0.0000 ± 0.0000	0.0000 ± 0.0000	0.0000 ± 0.0000	0.0000 ± 0.0000	Characterization of dihydroflavonol 7-reductase (DFR) genes and their association with cold and freezing stress in Brassica rapa
	TKPR2	Bra024746.1	Bra024746	0.0000 ± 0.0000	0.0000 ± 0.0000	0.0000 ± 0.0000	0.0000 ± 0.0000	0.0000 ± 0.0000	0.0000 ± 0.0000	0.0000 ± 0.0000	0.2147 ± 0.3718	Characterization of dihydroflavonol 8-reductase (DFR) genes and their association with cold and freezing stress in Brassica rapa
	TKPR2	Bra024744.1	Bra024744	0.4845 ± 0.0333	0.8573 ± 0.1982	0.4067 ± 0.1503	0.7643 ± 0.1439	0.5265 ± 0.137	0.76 ± 0.2086	1.6093 ± 0.6934	2.1221 ± 0.6865	Characterization of dihydroflavonol 9-reductase (DFR) genes and their association with cold and freezing stress in Brassica rapa
	CCR1	Bra020021.1	Bra020021	0.4425 ± 0.3008	0.3172 ± 0.2032	0.3882 ± 0.2123	0.3563 ± 0.1993	1.1681 ± 0.6165	1.3366 ± 0.0518	1.1792 ± 0.501	1.0424 ± 0.5932	Characterization of dihydroflavonol 10-reductase (DFR) genes and their association with cold and freezing stress in Brassica rapa
	TKPR1	Bra020020.1	Bra020020	0.6009 ± 0.2603	0.2509 ± 0.1103	0.1429 ± 0.0694	0.3841 ± 0.2819	1.861 ± 0.3986	0.5437 ± 0.3073	0.828 ± 0.5361	0.4305 ± 0.2754	Characterization of dihydroflavonol 11-reductase (DFR) genes and their association with cold and freezing stress in Brassica rapa
	TKPR1	Bra020019.1	Bra020019	3.5568 ± 0.6366	2.788 ± 2.354	1.5463 ± 1.0972	1.4239 ± 0.7577	3.8556 ± 0.667	1.918 ± 0.3694	4.6988 ± 2.1046	2.8266 ± 0.8629	Characterization of dihydroflavonol 12-reductase (DFR) genes and their association with cold and freezing stress in Brassica rapa
	BrbZIP	Bra000256.1	Bra000256	0.0000 ± 0.0000	0.7129 ± 0.307	0.1595 ± 0.091	0.1554 ± 0.0849	0.0523 ± 0.0906	0.5201 ± 0.3596	3.2732 ± 1.7773	1.0892 ± 0.2856	Transcriptome analysis of newly classified bZIP transcription factors of Brassica rapa in cold stress response
	BrbZIP	Bra003320.1	Bra003320	0.4109 ± 0.3358	2.934 ± 0.5009	0.4197 ± 0.0794	0.3303 ± 0.3637	0.0855 ± 0.0974	1.3786 ± 0.7405	8.9013 ± 7.8594	2.4024 ± 1.4779	Transcriptome analysis of newly classified bZIP transcription factors of Brassica rapa in cold stress response
	BrbZIP	Bra004689.1	Bra004689	0.043 ± 0.0373	1.3825 ± 0.3183	0.4367 ± 0.0943	0.2552 ± 0.2487	0.1526 ± 0.0767	0.5835 ± 0.447	5.1847 ± 3.9469	0.7559 ± 0.6726	Transcriptome analysis of newly classified bZIP transcription factors of Brassica rapa in cold stress response
	BrbZIP	Bra011648.1	Bra011648	10.4444 ± 1.034	9.7613 ± 2.0762	4.8471 ± 1.8654	7.0908 ± 0.6457	16.2518 ± 3.1862	14.8369 ± 2.2503	14.6648 ± 4.1381	15.8434 ± 2.3199	Transcriptome analysis of newly classified bZIP transcription factors of Brassica rapa in cold stress response
	BrbZIP	Bra020735.1	Bra020735	0.097 ± 0.084	0.245 ± 0.1513	0.0999 ± 0.0865	0.287 ± 0.1571	0.7897 ± 0.4588	0.6271 ± 0.2791	1.4575 ± 0.3876	1.5418 ± 1.2349	Transcriptome analysis of newly classified bZIP transcription factors of Brassica rapa in cold stress response
	BrbZIP	Bra023540.1	Bra023540	3.6053 ± 2.2229	4.6101 ± 1.235	9.6008 ± 1.5082	9.7675 ± 3.3989	8.9408 ± 1.723	3.1414 ± 1.6563	11.8918 ± 2.3333	6.8927 ± 2.7175	Transcriptome analysis of newly classified bZIP transcription factors of Brassica rapa in cold stress response
	BrTT8	Bra037887.1	Bra037887	1.9160 ± 0.5568	0.4966 ± 0.0465	0.4280 ± 0.2197	0.5110 ± 0.2298	2.0516 ± 0.5445	0.0750 ± 0.0634	0.5380 ± 0.3023	2.1653 ± 0.7309	Characterization of dihydroflavonol 4-reductase (DFR) genes and their association with cold and freezing stress in Brassica rapa
Oryza sativaL.	PCF5	Os01t0213800-01										Overexpression of microRNA319 impacts leaf morphogenesis and leads to enhanced cold tolerance in rice (Oryza sativa L.)
	RAN1	Os01t0611100-01										RAN1 is involved in plant cold resistance and development in rice (Oryza sativa)
	OsCSP1	Os02t0121100-01										Functional characterization of two cold shock domain proteins from Oryza sativa
	OsTCP21	Os03t0422702-00										MicroRNA319 positively regulates cold tolerance by targeting OsPCF6 and OsTCP21 in rice (Oryza sativa L.)
	OsHOS1	Os03t0737200-01										Isolation and characterization of rice (Oryza sativa L.) E3-ubiquitin ligase OsHOS1 gene in the modulation of cold stress response
	OsPCF6	Os03t0785800-01										MicroRNA319 positively regulates cold tolerance by targeting OsPCF6 and OsTCP21 in rice (Oryza sativa L.)
	OsLti6b	Os05t0138300-03										Isolation of cold stress-responsive genes in the reproductive organs, and characterization of the OsLti6b gene from rice (Oryza sativa L.)
	OsCATB	Os05t0310500-03										Changes in gene expression and catalase activity in Oryza sativa L. under abiotic stress
	OsiSAP8	Os06t0612800-01										Overexpression of OsiSAP8, a member of stress associated protein (SAP) gene family of rice confers tolerance to salt, drought and cold stress in transgenic tobacco and rice
	OsCSP2	Os08t0129200-02										Functional characterization of two cold shock domain proteins from Oryza sativa
	OsDREB	Os09t0522200-01										OsDREB genes in rice, Oryza sativa L., encode transcription activators that function in drought-, high-salt- and cold-responsive gene expression
	OsMYB2	Os12t0175400-01										A R2R3-type MYB gene, OsMYB2, is involved in salt, cold, and dehydration tolerance in rice
	PCF8	Os12t0616400-02	Bra032365	4.6232 ± 2.6034	4.8928 ± 2.3952	1.2235 ± 0.8226	1.1864 ± 0.2566	1.9360 ± 1.2777	2.3682 ± 0.7018	3.4194 ± 0.8974	2.5126 ± 0.3895	Overexpression of microRNA319 impacts leaf morphogenesis and leads to enhanced cold tolerance in rice (Oryza sativa L.)
Brassica napusL.	ABF4	BnaCnng41320D										Genome-wide identification of cold responsive transcription factors in Brassica napus L
	BBX25	BnaA05g11360D	Bra018249	6.0369 ± 1.3691	0.8382 ± 0.8515	1.0911 ± 0.3416	0.1761 ± 0.1812	11.0056 ± 0.9866	14.2598 ± 10.6031	6.1234 ± 4.7403	4.4285 ± 7.5968	Genome-wide identification of cold responsive transcription factors in Brassica napus L
	CBF1	BnaCnng49280D										Genome-wide identification of cold responsive transcription factors in Brassica napus L
		BnaC07g39680D										Genome-wide identification of cold responsive transcription factors in Brassica napus L
		BnaC03g71900D										Genome-wide identification of cold responsive transcription factors in Brassica napus L
		BnaA03g13620D	Bra022770	168.4767 ± 34.2979	256.6220 ± 93.3984	52.1187 ± 8.6199	157.7843 ± 12.6986	171.8763 ± 53.5790	325.2917 ± 30.9709	15.9228 ± 2.5415	51.7857 ± 23.6657	Genome-wide identification of cold responsive transcription factors in Brassica napus L
	CDF2	BnaC04g31720D										Genome-wide identification of cold responsive transcription factors in Brassica napus L
		BnaC09g41980D										Genome-wide identification of cold responsive transcription factors in Brassica napus L
		BnaA10g18420D	Bra008668	29.7592 ± 6.1019	16.2562 ± 3.2698	27.1599 ± 7.7017	18.3799 ± 10.5925	34.5459 ± 5.1754	13.9558 ± 4.7140	13.8543 ± 3.7971	5.2768 ± 1.3328	Genome-wide identification of cold responsive transcription factors in Brassica napus L
	COL9	BnaC03g35440D	Bra001264	14.8942 ± 1.0881	14.7342 ± 5.5263	2.0836 ± 0.1120	9.7280 ± 0.5355	28.5912 ± 3.8494	31.4437 ± 6.8544	1.4424 ± 0.3473	21.0050 ± 6.5437	Genome-wide identification of cold responsive transcription factors in Brassica napus L
	CZF1	BnaC03g22460D										Genome-wide identification of cold responsive transcription factors in Brassica napus L
	DREB2A	BnaC09g49920D										Genome-wide identification of cold responsive transcription factors in Brassica napus L
		BnaA10g25000D	Bra009112	41.6781 ± 3.8002	25.5247 ± 8.0225	7.1092 ± 1.6606	70.1100 ± 12.5666	57.1008 ± 17.3210	25.7404 ± 3.4123	7.5919 ± 1.0587	48.9201 ± 26.0867	Genome-wide identification of cold responsive transcription factors in Brassica napus L
	HDG1	BnaA05g05080D	Bra004934	7.3679 ± 0.4307	5.3293 ± 1.6283	2.3736 ± 0.0640	2.0860 ± 0.2121	5.1389 ± 1.1501	4.6029 ± 0.8721	4.2627 ± 1.0068	4.1787 ± 1.2264	Genome-wide identification of cold responsive transcription factors in Brassica napus L
	MYB305	BnaCnng44540D										Genome-wide identification of cold responsive transcription factors in Brassica napus L
	MYB32	BnaA03g53110D	Bra017685	25.3675 ± 1.3775	9.6386 ± 2.8808	4.9992 ± 0.7788	11.6131 ± 1.6250	25.6070 ± 5.2656	14.7479 ± 3.1792	4.6633 ± 0.4330	6.2796 ± 1.4769	Genome-wide identification of cold responsive transcription factors in Brassica napus L
	NAC072	BnaA01g16400D										Genome-wide identification of cold responsive transcription factors in Brassica napus L
	RAP2–1	BnaC08g04820D										Genome-wide identification of cold responsive transcription factors in Brassica napus L
	RAP2–2	BnaA05g25200D	Bra027355	460.9027 ± 43.2268	426.4907 ± 178.3844	297.5660 ± 8.2002	296.8117 ± 66.5878	592.4343 ± 82.5852	301.9343 ± 15.9315	265.4623 ± 30.8398	337.6227 ± 40.8645	Genome-wide identification of cold responsive transcription factors in Brassica napus L
		BnaC05g39400D										Genome-wide identification of cold responsive transcription factors in Brassica napus L
		BnaA03g33290D	Bra001541	64.7942 ± 8.4880	108.9757 ± 11.5505	75.2347 ± 5.4706	76.6068 ± 11.6760	74.9941 ± 15.6849	106.9244 ± 28.0393	52.5857 ± 8.7523	66.6039 ± 7.9893	Genome-wide identification of cold responsive transcription factors in Brassica napus L
	RVE1	BnaC03g08310D										Genome-wide identification of cold responsive transcription factors in Brassica napus L
	SCL30	BnaA01g19870D	Bra033813	28.7766 ± 3.9268	23.9473 ± 5.1597	17.7516 ± 1.7684	42.8919 ± 5.2077	46.1831 ± 17.6559	49.5002 ± 0.3037	36.1433 ± 12.0553	32.5170 ± 9.3426	Genome-wide identification of cold responsive transcription factors in Brassica napus L
		BnaC01g24660D										Genome-wide identification of cold responsive transcription factors in Brassica napus L
	TCP10	BnaA05g11640D	Bra018280	2.1874 ± 1.4844	1.8840 ± 0.4148	1.2565 ± 0.8358	0.5428 ± 0.2718	2.4223 ± 0.6983	1.2779 ± 0.3695	1.9074 ± 0.1976	0.9776 ± 0.3682	Genome-wide identification of cold responsive transcription factors in Brassica napus L
	WRKY11	BnaC07g43320D										Genome-wide identification of cold responsive transcription factors in Brassica napus L
	WRKY33	BnaA04g22040D	Bra017117	2.2584 ± 0.8737	3.1518 ± 0.9657	1.2486 ± 0.4124	1.8564 ± 0.6026	3.8952 ± 1.8847	10.4203 ± 1.6938	7.8532 ± 2.1972	2.8126 ± 1.1388	Genome-wide identification of cold responsive transcription factors in Brassica napus L
	ZAT10	BnaC03g58080D										Genome-wide identification of cold responsive transcription factors in Brassica napus L
		BnaC07g16940D										Genome-wide identification of cold responsive transcription factors in Brassica napus L
	ZAT12	BnaA03g09250D	Bra006691	17.6513 ± 10.7742	14.5800 ± 11.2139	5.4556 ± 1.1361	35.6319 ± 8.0853	29.6186 ± 3.2468	41.0558 ± 2.7349	26.2634 ± 4.3394	19.1068 ± 7.6498	Genome-wide identification of cold responsive transcription factors in Brassica napus L
			Bra006692	17.7609 ± 10.6386	14.8195 ± 11.4901	5.5106 ± 1.1865	35.8359 ± 8.2509	29.7931 ± 3.3576	41.3037 ± 2.3258	26.5052 ± 4.5916	19.1068 ± 7.6498
		BnaC09g35160D										Genome-wide identification of cold responsive transcription factors in Brassica napus L
		BnaA10g12780D	Bra002528	92.7290 ± 37.0747	28.5918 ± 22.0491	8.9916 ± 1.9847	106.9677 ± 6.1568	192.5083 ± 94.0551	160.8590 ± 37.7530	88.8155 ± 12.4686	78.3125 ± 29.6743	Genome-wide identification of cold responsive transcription factors in Brassica napus L
	ZAT6	BnaA10g25850D	Bra009464	87.7800 ± 14.8027	96.8503 ± 36.9054	35.0793 ± 6.3853	139.2003 ± 8.2972	119.3663 ± 46.8522	116.9456 ± 36.7804	24.2014 ± 9.0302	41.8672 ± 13.2537	Genome-wide identification of cold responsive transcription factors in Brassica napus L
		BnaCnng20570D										Genome-wide identification of cold responsive transcription factors in Brassica napus L
	ERF060	BnaA03g54460D	Bra017879	1.4545 ± 0.3556	0.9494 ± 0.3685	2.0449 ± 0.7712	2.3821 ± 0.5623	1.6233 ± 0.5317	1.5021 ± 1.2317	4.2489 ± 0.4426	3.2400 ± 1.1759	Genome-wide identification of cold responsive transcription factors in Brassica napus L
		BnaC07g46940D										Genome-wide identification of cold responsive transcription factors in Brassica napus L
	ATHB-12	BnaA09g55520D										Genome-wide identification of cold responsive transcription factors in Brassica napus L
	ERF4	BnaA05g24390D	Bra027270	127.5530 ± 5.3719	62.4016 ± 14.6419	30.4602 ± 3.6874	44.5397 ± 11.4579	131.0749 ± 55.1040	89.0394 ± 12.3114	33.0077 ± 8.0801	47.3721 ± 10.2364	Genome-wide identification of cold responsive transcription factors in Brassica napus L
		BnaA06g01090D										Genome-wide identification of cold responsive transcription factors in Brassica napus L
		BnaC03g39000D										Genome-wide identification of cold responsive transcription factors in Brassica napus L
		BnaA03g33790D	Bra001588	94.8615 ± 18.1954	72.3554 ± 46.0654	23.1353 ± 2.3097	102.2905 ± 12.0212	89.5459 ± 24.3113	134.4597 ± 6.9657	90.3637 ± 27.1445	102.0463 ± 34.2857	Genome-wide identification of cold responsive transcription factors in Brassica napus L
	HAP3C	BnaC05g37390D										Genome-wide identification of cold responsive transcription factors in Brassica napus L
		BnaC03g39380D										Genome-wide identification of cold responsive transcription factors in Brassica napus L
		BnaA03g33970D	Bra001615	12.1485 ± 2.6854	33.4902 ± 7.7852	35.4012 ± 3.1393	57.5496 ± 13.3545	9.6354 ± 4.4443	11.2812 ± 4.8738	19.8479 ± 4.0201	34.8411 ± 13.0580	Genome-wide identification of cold responsive transcription factors in Brassica napus L
		BnaA01g28350D	Bra021147	17.7247 ± 2.3991	23.9716 ± 3.0731	27.3750 ± 2.9633	37.1400 ± 2.6874	30.8146 ± 18.2211	11.0793 ± 4.2203	33.3155 ± 5.3843	26.8022 ± 4.9470	Genome-wide identification of cold responsive transcription factors in Brassica napus L
	LZF1	BnaC02g25060D										Genome-wide identification of cold responsive transcription factors in Brassica napus L
	MYB77	BnaC08g48630D										Genome-wide identification of cold responsive transcription factors in Brassica napus L
	RAP2–7	BnaA07g13990D	Bra011939	64.0251 ± 6.3008	47.2866 ± 5.3819	42.2559 ± 3.2464	42.3864 ± 3.3539	64.3023 ± 1.1528	67.6537 ± 17.3717	41.4123 ± 12.5887	33.4670 ± 1.2942	Genome-wide identification of cold responsive transcription factors in Brassica napus L
		BnaC04g15640D										Genome-wide identification of cold responsive transcription factors in Brassica napus L
	RAV1	BnaA06g07470D	Bra019821	115.4191 ± 19.0409	189.3893 ± 26.4806	134.2790 ± 7.5594	190.0010 ± 21.3958	118.1054 ± 21.7280	238.1153 ± 65.8970	93.3073 ± 14.8843	125.6560 ± 27.9898	Genome-wide identification of cold responsive transcription factors in Brassica napus L
		BnaAnng40580D										Genome-wide identification of cold responsive transcription factors in Brassica napus L
		BnaCnng37790D										Genome-wide identification of cold responsive transcription factors in Brassica napus L
	TRB2	BnaA06g24950D	Bra024438	4.7169 ± 0.5739	6.5860 ± 1.1540	7.8237 ± 1.8293	6.9511 ± 1.1603	4.6216 ± 0.4958	6.0443 ± 0.4540	7.2492 ± 0.1461	7.0249 ± 0.9577	Genome-wide identification of cold responsive transcription factors in Brassica napus L

## Sheet: Sheet4
Supplementary Table S5. Cold tolerance related homologs in Longyou-7 and information of variation
Chiffu	Longyou-7 Copy1	Longyou-7 Copy2	Longyou-7 Copy3	Longyou-7 Copy4	Variation
Bra006692.1	Brapa03T001082.1	Brapa10T001606.1	Brapa02T001108.1	Brapa06T002025.1	CNV
Bra001264.1	Brapa03T003369.1	Brapa05T003558.1	Brapa01T004195.1	.	CNV
Bra001541.1	Brapa03T003674.1	Brapa05T003041.1	Brapa01T003784.1	.	CNV
Bra001588.1	Brapa03T003730.1	Brapa05T002963.1	Brapa01T003729.1	.	CNV
Bra001615.1	Brapa03T003764.1	Brapa05T002892.1	Brapa01T003666.1	.	CNV
Bra002528.1	Brapa10T001606.1	Brapa02T001108.1	.	.	CNV
Bra003980.1	Brapa07T003221.1	Brapa07T003684.1	Brapa02T002025.1	Brapa08T002670.1	CNV
Bra004004.1	Brapa07T003248.1	Brapa07T003630.1	.	.	CNV
Bra006543.1	Brapa03T000930.1	.	Brapa02T000892.1	.	CNV
Bra006691.1	Brapa03T001082.1	Brapa10T001606.1	Brapa02T001108.1	Brapa06T002025.1	SV + CNV
Bra007881.1	Brapa02T002025.1	Brapa07T003684.1	Brapa07T003221.1	Brapa08T002670.1	SV + CNV
Bra008668.1	Brapa10T000999.1	Brapa02T000621.1	Brapa03T003118.1	Brapa01T004500.1	CNV
Bra009112.1	Brapa10T000273.1	Brapa02T000174.1	Brapa05T003336.1	Brapa01T004028.1	CNV
Bra010461.1	Brapa08T002050.1	.	Brapa03T005307.1	.	CNV
Bra010463.1	Brapa08T002051.1	.	Brapa03T005307.1	.	CNV
Bra011939.1	Brapa07T002056.1	.	Brapa03T002489.1	.	SV + CNV
Bra012938.1	Brapa03T004507.1	Brapa02T004475.1	Brapa10T000411.1	.	SV + CNV
Bra013652.1	Brapa01T001332.1	Brapa03T005108.1	.	.	SV + CNV
Bra016266.1	Brapa07T003684.1	Brapa02T002025.1	Brapa08T002670.1	.	SV + CNV
Bra017117.1	Brapa04T002903.1	Brapa05T000727.1	Brapa03T002010.1	.	SV + CNV
Bra017493.1	Brapa09T004378.1	Brapa06T003738.1	Brapa01T000879.1	Brapa08T001264.1	CNV
Bra017685.1	Brapa03T005967.1	Brapa01T000339.1	Brapa03T004387.1	Brapa06T004096.1	SV + CNV
Bra017879.1	Brapa03T006193.1	Brapa01T000070.1	Brapa08T002248.1	.	CNV
Bra018249.1	Brapa05T001351.1	Brapa03T001645.1	Brapa10T002707.1	.	SV + CNV
Bra019162.1	Brapa03T005307.1	.	Brapa08T002049.1	Brapa10T002304.1	CNV
Bra019821.1	Brapa06T000839.1	Brapa09T000611.1	Brapa06T003490.1	.	CNV
Bra020088.1	Brapa02T000892.1	.	Brapa03T000930.1	.	CNV
Bra021174.1	Brapa10T001313.1	Brapa02T000876.1	.	.	CNV
Bra002270.1	Brapa06T002378.1	Brapa02T004604.1	.	.	CNV
Bra024255.1	Brapa06T002577.1	Brapa09T005714.1	Brapa01T002342.1	.	SV + CNV
Bra024438.1	Brapa06T003738.1	Brapa02T003511.1	Brapa01T000879.1	.	SV + CNV
Bra024953.1	Brapa06T003738.1	Brapa02T003511.1	Brapa01T000879.1	.	SV + CNV
Bra027355.1	Brapa02T004475.1	Brapa03T004507.1	Brapa09T005905.1	.	SV + CNV
Bra029319.1	Brapa04T001973.1	Brapa09T001259.1	Brapa01T000629.1	.	CNV
Bra032089.1	Brapa09T003122.1	Brapa08T002382.2	.	.	SV + CNV
Bra032365.1	Brapa01T002505.1	Brapa06T002002.1	Brapa10T001646.1	.	CNV
Bra033813.1	Brapa09T005792.1	Brapa06T002378.1	Brapa02T004604.1	.	SV
Bra037760.1	Brapa08T001079.1	.	Brapa01T003133.1	Brapa03T004092.1	SV + CNV
Bra039855.1	Brapa07T001753.1	Brapa06T001555.1	.	Brapa07T004182.1	CNV
Bra012230.1	Brapa07T001753.1	Brapa06T001555.1	.	Brapa07T004182.1	SV + CNV

## Sheet: Sheet6
Supplementary Table S6. Coverage of structural variant regions in gene HDG1 of Longyou-7 from 80 resequencing data
ID	Chromosome	Start	End	Reads number	Base number	Interval length	Average coverage
SRR7704974	A05	3060452	3065311	45	289	4859	0.0594773
SRR7704943	A05	3060452	3065311	16	296	4859	0.0609179
SRR7705042	A05	3060452	3065311	14	460	4859	0.0946697
SRR7705045	A05	3060452	3065311	38	469	4859	0.0965219
SRR7704944	A05	3060452	3065311	24	488	4859	0.100432
SRR7705011	A05	3060452	3065311	51	588	4859	0.121013
SRR7704989	A05	3060452	3065311	19	674	4859	0.138712
SRR7704965	A05	3060452	3065311	30	703	4859	0.14468
SRR7704991	A05	3060452	3065311	34	855	4859	0.175962
SRR7704967	A05	3060452	3065311	68	991	4859	0.203951
SRR7705016	A05	3060452	3065311	49	1194	4859	0.24573
SRR7704990	A05	3060452	3065311	78	1523	4859	0.313439
SRR7705089	A05	3060452	3065311	61	3560	4859	0.732661
SRR7704958	A05	3060452	3065311	311	4806	4859	0.989092
SRR7705023	A05	3060452	3065311	640	4835	4859	0.995061
SRR7705043	A05	3060452	3065311	405	4837	4859	0.995472
SRR7704959	A05	3060452	3065311	302	4849	4859	0.997942
SRR7704964	A05	3060452	3065311	450	4854	4859	0.998971
SRR7705035	A05	3060452	3065311	417	4855	4859	0.999177
SRR7705046	A05	3060452	3065311	436	4856	4859	0.999383
SRR7704950	A05	3060452	3065311	710	4858	4859	0.999794
SRR7704938	A05	3060452	3065311	3870	4859	4859	1
SRR7704940	A05	3060452	3065311	426	4859	4859	1
SRR7704942	A05	3060452	3065311	508	4859	4859	1
SRR7704945	A05	3060452	3065311	501	4859	4859	1
SRR7704949	A05	3060452	3065311	1369	4859	4859	1
SRR7704954	A05	3060452	3065311	460	4859	4859	1
SRR7704955	A05	3060452	3065311	1138	4859	4859	1
SRR7704956	A05	3060452	3065311	498	4859	4859	1
SRR7704960	A05	3060452	3065311	446	4859	4859	1
SRR7704961	A05	3060452	3065311	541	4859	4859	1
SRR7704963	A05	3060452	3065311	445	4859	4859	1
SRR7704966	A05	3060452	3065311	430	4859	4859	1
SRR7704968	A05	3060452	3065311	345	4859	4859	1
SRR7704969	A05	3060452	3065311	678	4859	4859	1
SRR7704970	A05	3060452	3065311	638	4859	4859	1
SRR7704971	A05	3060452	3065311	776	4859	4859	1
SRR7704972	A05	3060452	3065311	519	4859	4859	1
SRR7704975	A05	3060452	3065311	396	4859	4859	1
SRR7704976	A05	3060452	3065311	417	4859	4859	1
SRR7704977	A05	3060452	3065311	1084	4859	4859	1
SRR7704978	A05	3060452	3065311	1082	4859	4859	1
SRR7704979	A05	3060452	3065311	596	4859	4859	1
SRR7704980	A05	3060452	3065311	910	4859	4859	1
SRR7704981	A05	3060452	3065311	1104	4859	4859	1
SRR7704982	A05	3060452	3065311	955	4859	4859	1
SRR7704984	A05	3060452	3065311	676	4859	4859	1
SRR7704985	A05	3060452	3065311	624	4859	4859	1
SRR7704986	A05	3060452	3065311	1611	4859	4859	1
SRR7704987	A05	3060452	3065311	1011	4859	4859	1
SRR7704992	A05	3060452	3065311	7581	4859	4859	1
SRR7704997	A05	3060452	3065311	547	4859	4859	1
SRR7704999	A05	3060452	3065311	1023	4859	4859	1
SRR7705000	A05	3060452	3065311	533	4859	4859	1
SRR7705001	A05	3060452	3065311	497	4859	4859	1
SRR7705002	A05	3060452	3065311	354	4859	4859	1
SRR7705003	A05	3060452	3065311	505	4859	4859	1
SRR7705004	A05	3060452	3065311	449	4859	4859	1
SRR7705005	A05	3060452	3065311	527	4859	4859	1
SRR7705006	A05	3060452	3065311	512	4859	4859	1
SRR7705007	A05	3060452	3065311	509	4859	4859	1
SRR7705010	A05	3060452	3065311	429	4859	4859	1
SRR7705013	A05	3060452	3065311	1102	4859	4859	1
SRR7705015	A05	3060452	3065311	1583	4859	4859	1
SRR7705017	A05	3060452	3065311	451	4859	4859	1
SRR7705020	A05	3060452	3065311	1079	4859	4859	1
SRR7705021	A05	3060452	3065311	682	4859	4859	1
SRR7705022	A05	3060452	3065311	503	4859	4859	1
SRR7705024	A05	3060452	3065311	778	4859	4859	1
SRR7705025	A05	3060452	3065311	489	4859	4859	1
SRR7705026	A05	3060452	3065311	523	4859	4859	1
SRR7705027	A05	3060452	3065311	575	4859	4859	1
SRR7705038	A05	3060452	3065311	568	4859	4859	1
SRR7705041	A05	3060452	3065311	426	4859	4859	1
SRR7705050	A05	3060452	3065311	547	4859	4859	1
SRR7705051	A05	3060452	3065311	577	4859	4859	1
SRR7705055	A05	3060452	3065311	582	4859	4859	1
SRR7705057	A05	3060452	3065311	802	4859	4859	1
SRR7705060	A05	3060452	3065311	580	4859	4859	1
SRR7705088	A05	3060452	3065311	548	4859	4859	1

## Sheet: Sheet7
Supplementary Table S7. Coverage of structural variant regions in gene BrANS3 of Longyou-7 from 80 resequencing data
ID	Chromosome	Start	End	Reads number	Base number	Interval length	Average coverage
SRR7704949	jcf7180000042309	6458148	6458386	0	0	238	0
SRR7704950	jcf7180000042309	6458148	6458386	0	0	238	0
SRR7704970	jcf7180000042309	6458148	6458386	0	0	238	0
SRR7704977	jcf7180000042309	6458148	6458386	0	0	238	0
SRR7704984	jcf7180000042309	6458148	6458386	0	0	238	0
SRR7704989	jcf7180000042309	6458148	6458386	2	42	238	0.176471
SRR7705013	jcf7180000042309	6458148	6458386	1	89	238	0.37395
SRR7704992	jcf7180000042309	6458148	6458386	3	100	238	0.420168
SRR7705020	jcf7180000042309	6458148	6458386	1	117	238	0.491597
SRR7704972	jcf7180000042309	6458148	6458386	2	119	238	0.5
SRR7704991	jcf7180000042309	6458148	6458386	3	150	238	0.630252
SRR7705046	jcf7180000042309	6458148	6458386	14	162	238	0.680672
SRR7705000	jcf7180000042309	6458148	6458386	12	166	238	0.697479
SRR7705005	jcf7180000042309	6458148	6458386	13	179	238	0.752101
SRR7704985	jcf7180000042309	6458148	6458386	24	202	238	0.848739
SRR7705027	jcf7180000042309	6458148	6458386	18	202	238	0.848739
SRR7704990	jcf7180000042309	6458148	6458386	6	203	238	0.852941
SRR7704956	jcf7180000042309	6458148	6458386	11	211	238	0.886555
SRR7704945	jcf7180000042309	6458148	6458386	5	212	238	0.890756
SRR7704979	jcf7180000042309	6458148	6458386	4	217	238	0.911765
SRR7705006	jcf7180000042309	6458148	6458386	15	217	238	0.911765
SRR7705021	jcf7180000042309	6458148	6458386	18	217	238	0.911765
SRR7705025	jcf7180000042309	6458148	6458386	12	221	238	0.928571
SRR7705017	jcf7180000042309	6458148	6458386	26	224	238	0.941176
SRR7704975	jcf7180000042309	6458148	6458386	20	225	238	0.945378
SRR7705060	jcf7180000042309	6458148	6458386	18	225	238	0.945378
SRR7704986	jcf7180000042309	6458148	6458386	10	233	238	0.978992
SRR7704964	jcf7180000042309	6458148	6458386	13	237	238	0.995798
SRR7704938	jcf7180000042309	6458148	6458386	98	238	238	1
SRR7704940	jcf7180000042309	6458148	6458386	27	238	238	1
SRR7704942	jcf7180000042309	6458148	6458386	31	238	238	1
SRR7704943	jcf7180000042309	6458148	6458386	32	238	238	1
SRR7704944	jcf7180000042309	6458148	6458386	45	238	238	1
SRR7704954	jcf7180000042309	6458148	6458386	15	238	238	1
SRR7704955	jcf7180000042309	6458148	6458386	12	238	238	1
SRR7704958	jcf7180000042309	6458148	6458386	16	238	238	1
SRR7704959	jcf7180000042309	6458148	6458386	10	238	238	1
SRR7704960	jcf7180000042309	6458148	6458386	22	238	238	1
SRR7704961	jcf7180000042309	6458148	6458386	53	238	238	1
SRR7704963	jcf7180000042309	6458148	6458386	31	238	238	1
SRR7704965	jcf7180000042309	6458148	6458386	38	238	238	1
SRR7704966	jcf7180000042309	6458148	6458386	17	238	238	1
SRR7704967	jcf7180000042309	6458148	6458386	71	238	238	1
SRR7704968	jcf7180000042309	6458148	6458386	83	238	238	1
SRR7704969	jcf7180000042309	6458148	6458386	44	238	238	1
SRR7704971	jcf7180000042309	6458148	6458386	34	238	238	1
SRR7704974	jcf7180000042309	6458148	6458386	51	238	238	1
SRR7704976	jcf7180000042309	6458148	6458386	58	238	238	1
SRR7704978	jcf7180000042309	6458148	6458386	10	238	238	1
SRR7704980	jcf7180000042309	6458148	6458386	49	238	238	1
SRR7704981	jcf7180000042309	6458148	6458386	38	238	238	1
SRR7704982	jcf7180000042309	6458148	6458386	32	238	238	1
SRR7704987	jcf7180000042309	6458148	6458386	19	238	238	1
SRR7704997	jcf7180000042309	6458148	6458386	36	238	238	1
SRR7704999	jcf7180000042309	6458148	6458386	33	238	238	1
SRR7705001	jcf7180000042309	6458148	6458386	58	238	238	1
SRR7705002	jcf7180000042309	6458148	6458386	49	238	238	1
SRR7705003	jcf7180000042309	6458148	6458386	92	238	238	1
SRR7705004	jcf7180000042309	6458148	6458386	65	238	238	1
SRR7705007	jcf7180000042309	6458148	6458386	36	238	238	1
SRR7705010	jcf7180000042309	6458148	6458386	29	238	238	1
SRR7705011	jcf7180000042309	6458148	6458386	48	238	238	1
SRR7705015	jcf7180000042309	6458148	6458386	51	238	238	1
SRR7705016	jcf7180000042309	6458148	6458386	6	238	238	1
SRR7705022	jcf7180000042309	6458148	6458386	32	238	238	1
SRR7705023	jcf7180000042309	6458148	6458386	53	238	238	1
SRR7705024	jcf7180000042309	6458148	6458386	60	238	238	1
SRR7705026	jcf7180000042309	6458148	6458386	26	238	238	1
SRR7705035	jcf7180000042309	6458148	6458386	61	238	238	1
SRR7705038	jcf7180000042309	6458148	6458386	33	238	238	1
SRR7705041	jcf7180000042309	6458148	6458386	28	238	238	1
SRR7705042	jcf7180000042309	6458148	6458386	23	238	238	1
SRR7705043	jcf7180000042309	6458148	6458386	41	238	238	1
SRR7705045	jcf7180000042309	6458148	6458386	14	238	238	1
SRR7705050	jcf7180000042309	6458148	6458386	37	238	238	1
SRR7705051	jcf7180000042309	6458148	6458386	45	238	238	1
SRR7705055	jcf7180000042309	6458148	6458386	26	238	238	1
SRR7705057	jcf7180000042309	6458148	6458386	15	238	238	1
SRR7705088	jcf7180000042309	6458148	6458386	21	238	238	1
SRR7705089	jcf7180000042309	6458148	6458386	27	238	238	1
